# Supplementary figures and images for: Modes of synchrony in self-propelled pentanol drops
Source: Royal Society of Chemistry journal article supplement (doi:10.1039/d1sm01488a), 2022-01-01

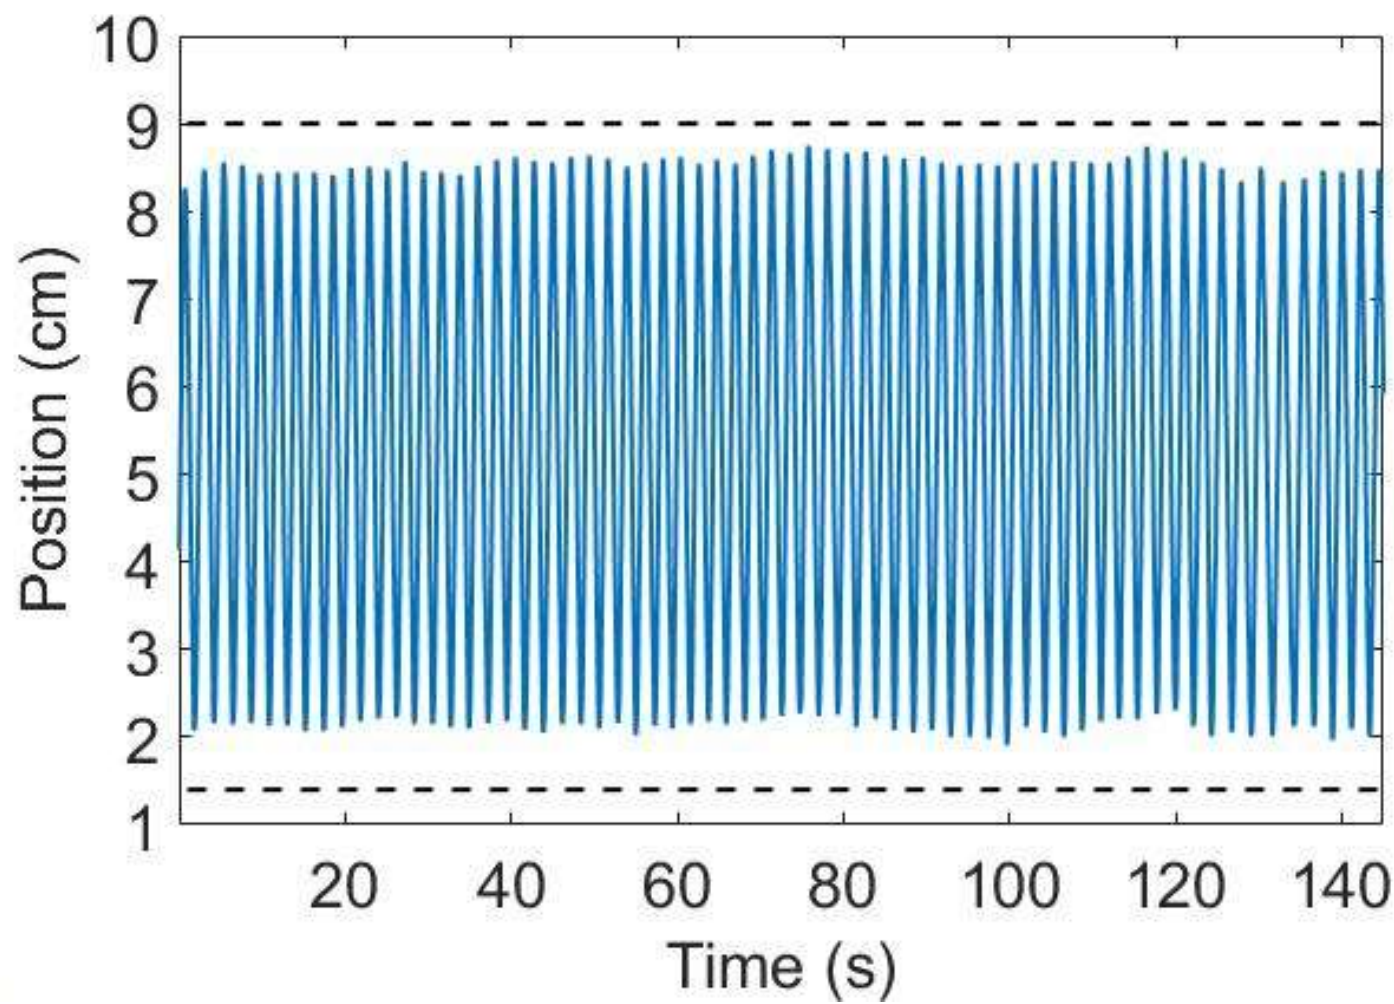

Supplement: d1sm01488a1.pdf [file d1sm01488a1.pdf]

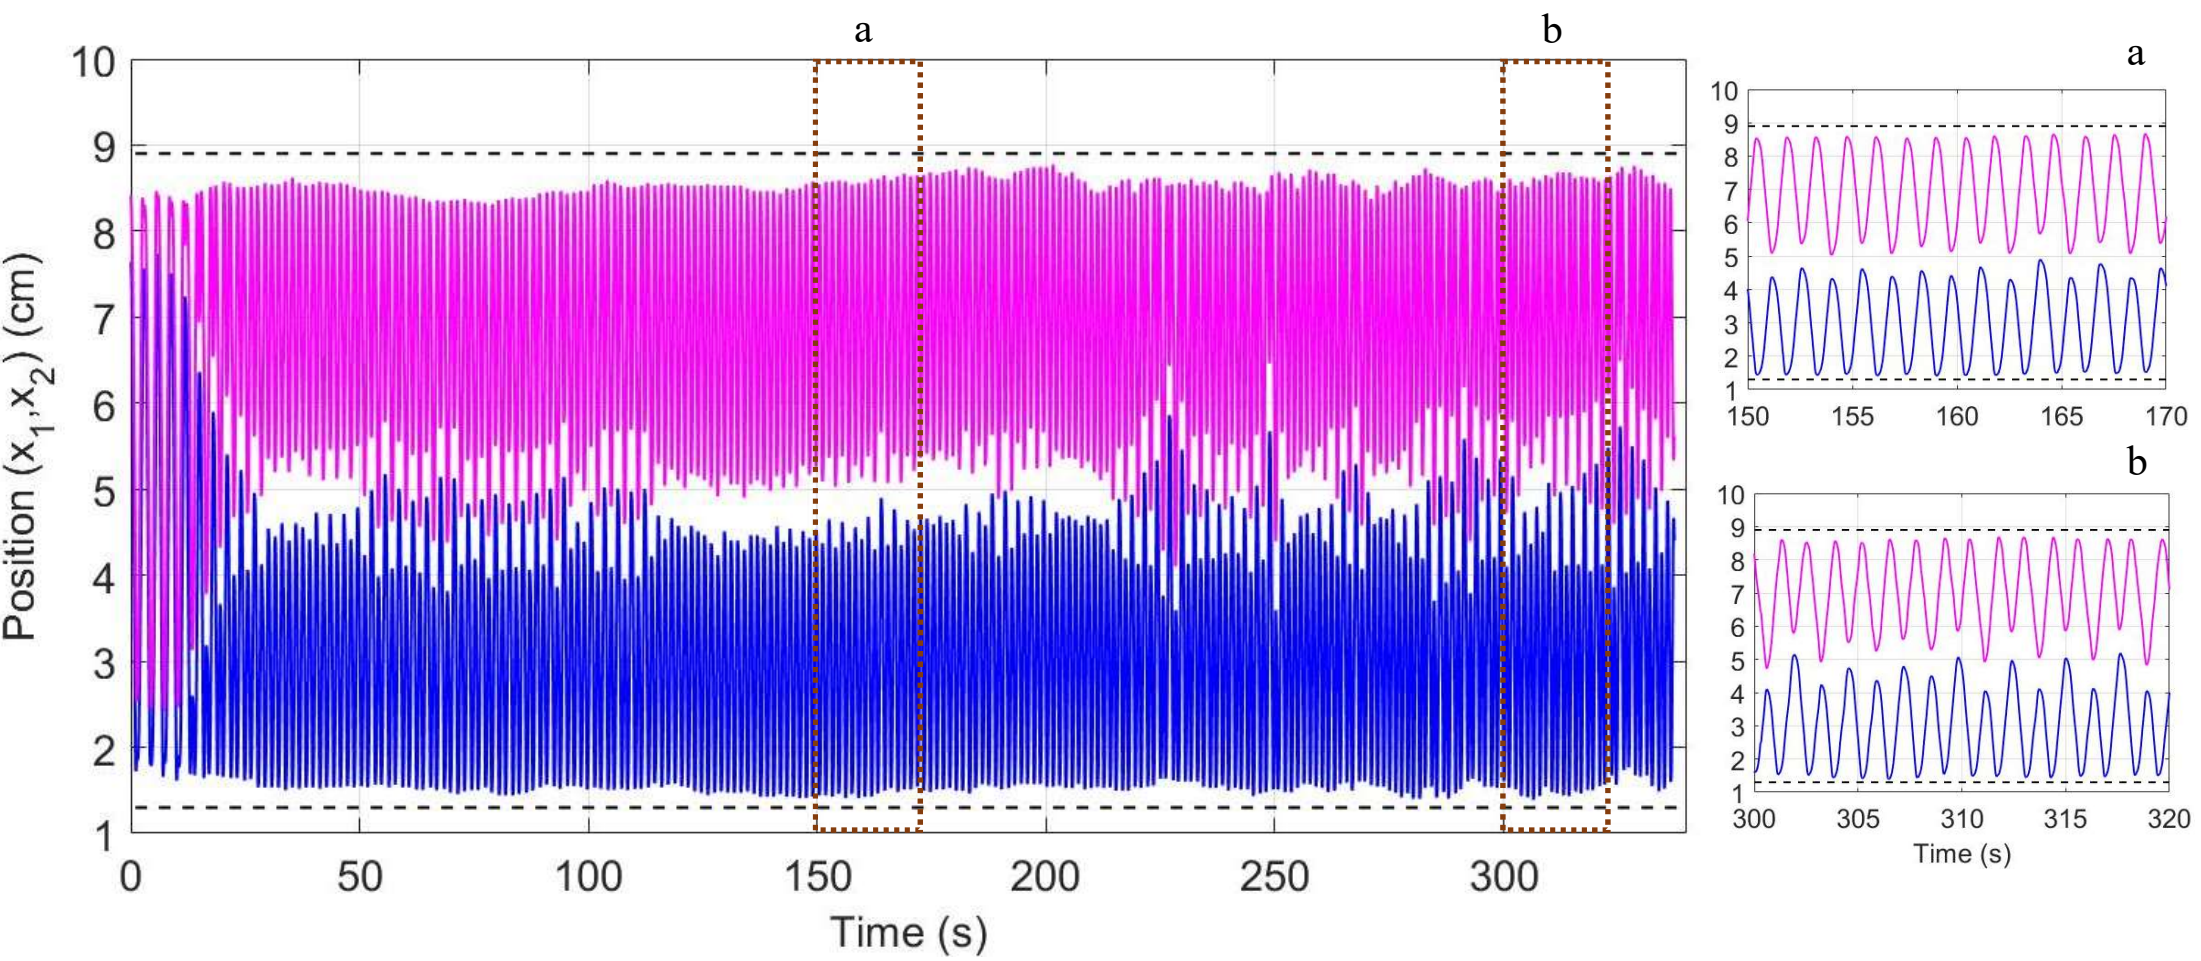

Supplement: d1sm01488a4.pdf [file d1sm01488a4.pdf]

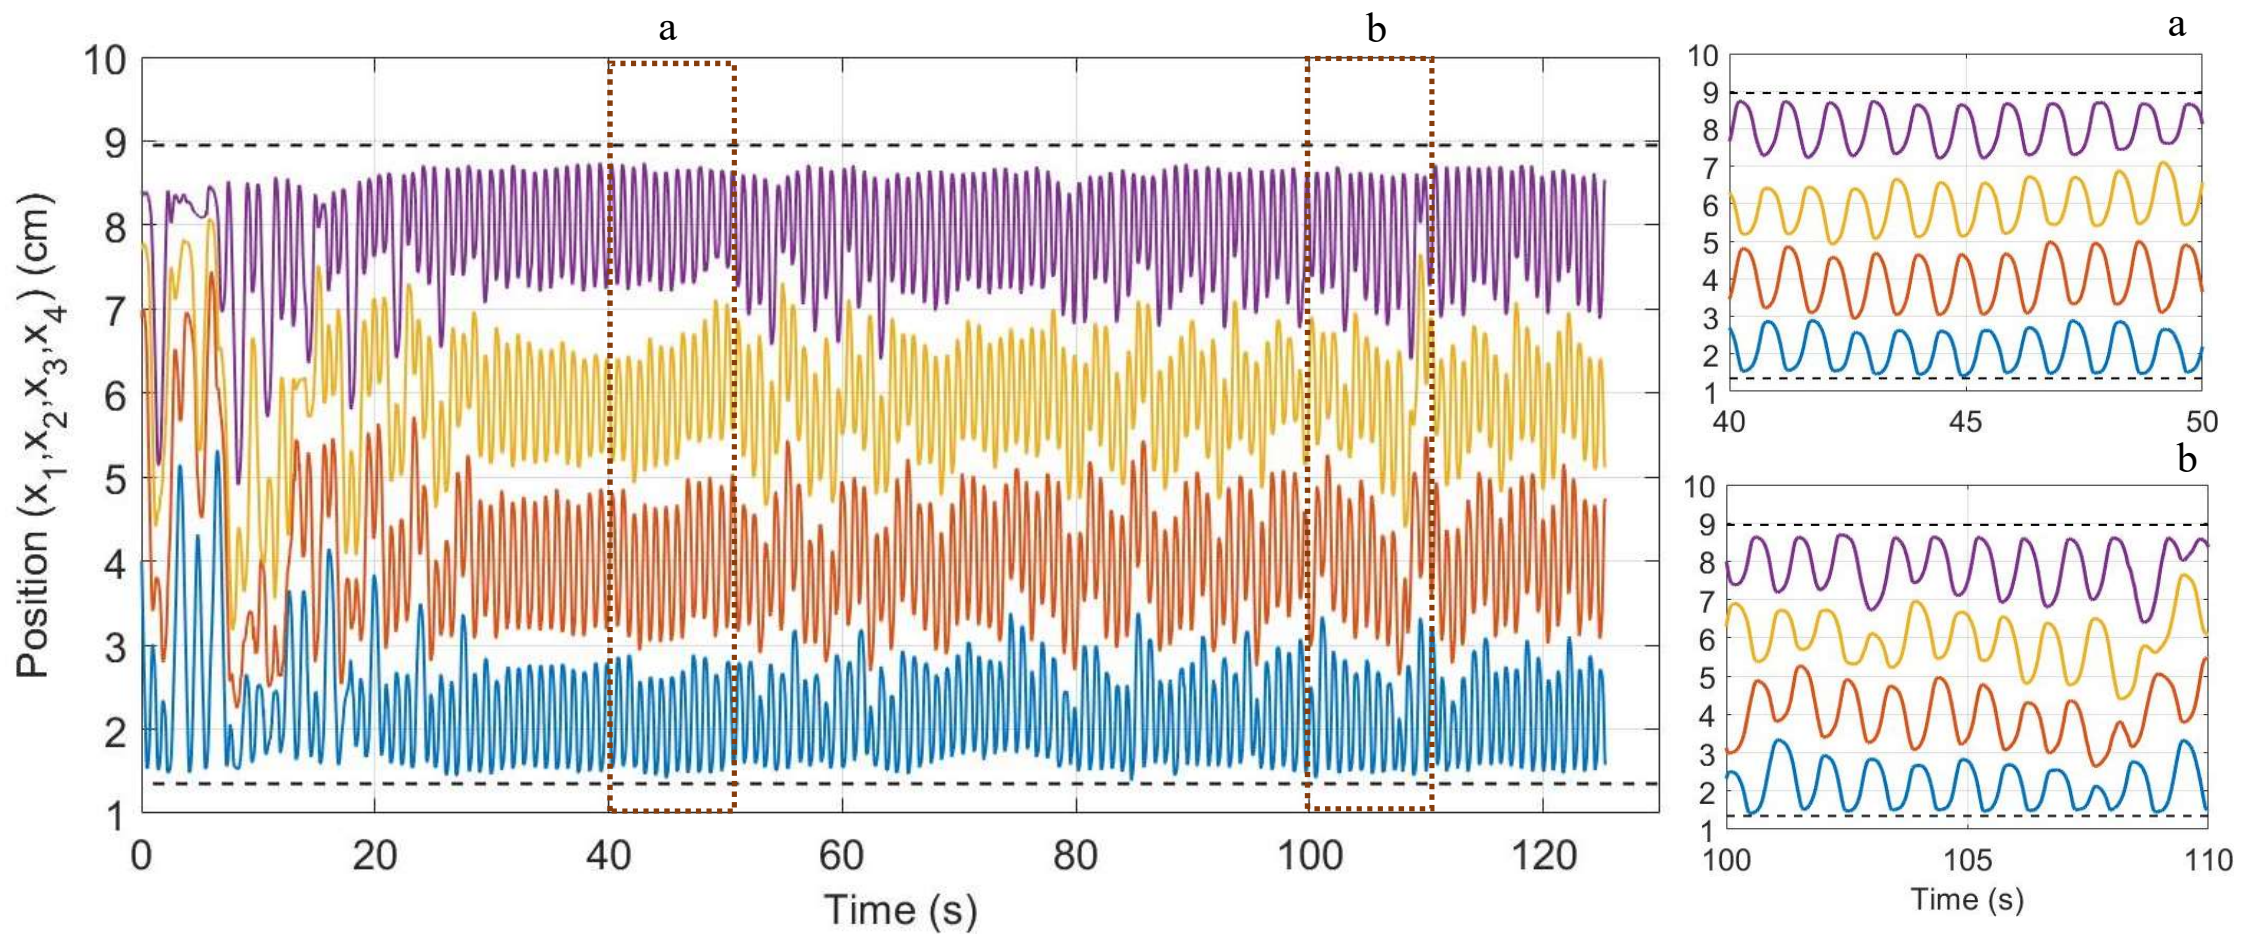

Supplement: d1sm01488a7.pdf [file d1sm01488a7.pdf]
